# Supplementary material
Source: PubMed Central journal article supplement (PMC2775842)
Supplement: mmc1.pdf [file mmc1.pdf]

## Supplemental Data

### Homozygous Mutations in *ADAMTS10* and *ADAMTS17*

#### Cause Lenticular Myopia, Ectopia Lentis,

#### Glaucoma, Spherophakia, and Short Stature

Jose Morales, Latifa Al-Sharif, Dania S. Khalil, Jameela M.A. Shinwari, Prashant Bavi, Rahima A Al-Mahrouqi, Ali Al-Rajhi, Fowzan S. Alkuraya, Brian F. Meyer, and Nada Al Tassan

**Figure S1: Immunohistochemical Studies of ADAMTS17.** **I)** Western blot assay using ADAMTS17 monoclonal antibody on three different cell lines showing the ADAMTS17 estimated band size of 121kDa. **II)** Tissue microarray based Immunohistochemical studies of ADAMTS17 in human tissues (**A**) weak cytoplasmic staining, 1+ in normal colorectal mucosa, (**B**) no staining, 0 in pancreatic tissue (**C**) moderate cytoplasmic (2+) as well as membranous staining, (1+) in liver (**D**) strong staining, 3+ in the cytoplasmic and membranous compartment in epithelial ovarian carcinoma. 20 X/0.70 objective on an Olympus BX 51 microscope (Olympus America Inc, Center Valley, PA, USA) with the inset showing a 40X/ 0.85 aperture magnified view of the same. **III)** IHC on mouse E14.5 eye section using ADAMTS17 monoclonal mouse antibody, the ciliary body is outlined in box.

I)

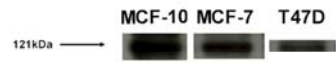

II)

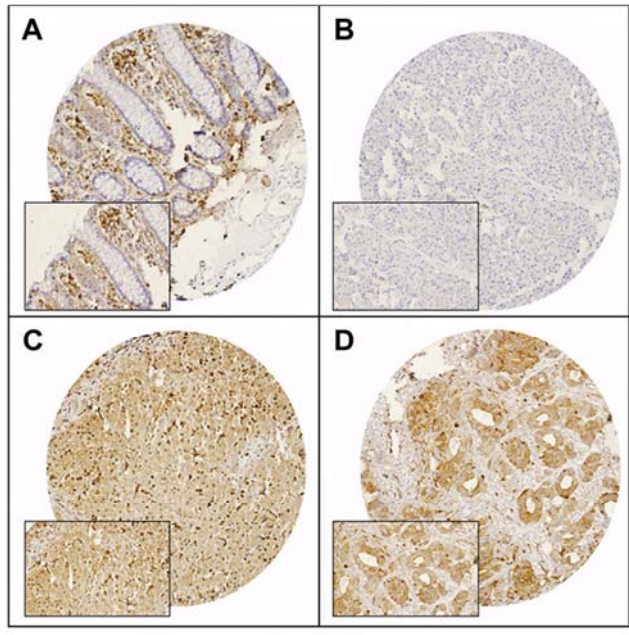

III)

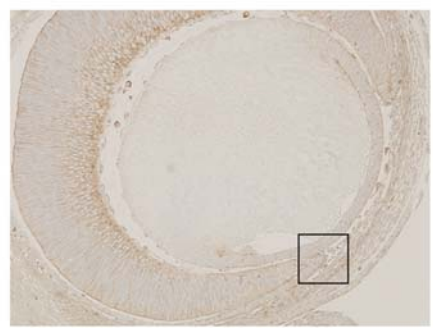

**Table S1: Primers and PCR Conditions for *FBN1* Gene.**

| Gene/Exon            | Primer Sequence 5' – 3'                                | Product Size | Annealing Temperature °C/Cycles |
|----------------------|--------------------------------------------------------|--------------|---------------------------------|
| FBN1X2F<br>FBN1X2R   | AGCAGCGCCTGGAGAAG<br>GGTGGGGACTAAACAACCCCT             | 467bp        | 50/30 +10%<br>DMSO              |
| FBN1X3F<br>FBN1X3R   | GCTTTATCTGTCTGCCAGGATT<br>AAGCTGGAAGGCTGTACTATCAA      | 333bp        | 56/30                           |
| FBN1X4F<br>FBN1X4R   | ACACCTGAGGCTTAAGGTCATA<br>GAGAAGGCAGATGTTCTAGTGAAA     | 368bp        | 56/30                           |
| FBN1X5F<br>FBN1X5R   | GCCGGTAAATGATTTTACACAC<br>CCAATTGGAAAATTGGTGT          | 470bp        | 52/30                           |
| FBN1X6F<br>FBN1X6R   | GTCCAAAACAAACACCAGGG<br>TAGGGACCTTCCCAATGACA           | 365bp        | 56/30                           |
| FBN1X7F<br>FBN1X7R   | TGCATGATTCTGTCCCTGAA<br>TGGATATCATGCAGTCAGCG           | 460bp        | 56/30                           |
| FBN1X8F<br>FBN1X8R   | TGATGGACAAAATAACTCACCGA<br>AGCACAAAGGCATATTATTACTGTTA  | 415bp        | 56/30                           |
| FBN1X9F<br>FBN1X9R   | ACTGTTCTCCATGCGGTTTT<br>TGCCTCTGTTCTTTAAGAGGG          | 438bp        | 52/30                           |
| FBN1X10F<br>FBN1X10R | GGGGCAGAGGTGTGAGTTAAT<br>TTCCCTGGACGTCATCTCTT          | 425bp        | 52/30                           |
| FBN1X11F<br>FBN1X11R | GGTTGCTGCTGCAGGTATTA<br>TCTATGCAATAGGAAAATTGAGACA      | 551bp        | 56/30                           |
| FBN1X12F<br>FBN1X12R | GCAATGTGATCTCTGTTGGC<br>CCTCCCAACACCTGGATG             | 514bp        | 56/30                           |
| FBN1X13F<br>FBN1X13R | TGGCTAATGACATATTGTAGTGGA<br>CAGAATGACAATAGGTGGAACATAAG | 435bp        | 56/30                           |
| FBN1X14F<br>FBN1X14R | TGTCTTTTCAACTCTGATAACCCT<br>TCATGGAAAAATTAGGCTTCCT     | 459bp        | 56/30                           |
| FBN1X15F<br>FBN1X15R | GATCTTATTTGGATGAAAGTTAGCC<br>TCCCAAACCAAAATTCAAGG      | 391bp        | 56/30                           |
| FBN1X16F<br>FBN1X16R | TGAGCTTTTGTGCTGATGC<br>TGGTTTGTGCTCTGCAAAAT            | 384bp        | 56/30                           |
| FBN1X17F<br>FBN1X17R | CCCCGATATCAGAGGCATT<br>AAGACCCCAAGAAGGCACAT            | 416bp        | 50/35+10% DMSO                  |
| FBN1X18F<br>FBN1X18R | GGGAGATACCTCCTTTTCCG<br>GATGGCCAGAGAGGGAGTC            | 310bp        | 56/30                           |
| FBN1X19F<br>FBN1X19R | TGTTCTCTTCCAGTGAAATCG<br>AACATCCGAAGTATAAAGTGCCA       | 393bp        | 56/30                           |
| FBN1X20F<br>FBN1X20R | TGCTACAGGAGTTTTGCCTTT<br>CACAGAATTTCAACTAAACTGGCA      | 386bp        | 56/30                           |
| FBN1X21F<br>FBN1X21R | AGCCCAGCTTFACTGTGTGG<br>CAAAAAATAGCATTGAAACAAGGA       | 377bp        | 56/30                           |
| FBN1X22F<br>FBN1X22R | TCCTTGTTCAAAATGCTATTTTTG<br>CCCATTGCAATATGTTTCG        | 375bp        | 56/30                           |
| FBN1X23F<br>FBN1X23R | CCTATGCAATCGCAGAAACA<br>CCTGTCTTTGGACATAGCG            | 426bp        | 56/30                           |
| FBN1X24F<br>FBN1X24R | TTGCTATTCAGGCACCCTAGA<br>CATGCTGAATTTGGAGTGTG          | 413bp        | 50/30                           |
| FBN1X25F<br>FBN1X25R | GGCAAGGATACTTACCCAGA<br>CCAGGACTTCTGGACCAAAC           | 588bp        | 56/30                           |
| FBN1X26F<br>FBN1X26R | TGGATCATCACACATTCTTGG<br>CAAGTGGCAGCAAATGAGTC          | 385bp        | 56/30                           |
| FBN1X27F<br>FBN1X27R | AGCCTTAAGGGCCAGGAGAG<br>CCTCAGTCTCCCTCTGTTC            | 389bp        | 56/30                           |
| FBN1X28F<br>FBN1X28R | CCAGAGAGTTGCCACCTT<br>CATTGATGCTGTCCGGAAA              | 374bp        | 56/30                           |
| FBN1X29F<br>FBN1X29R | ATCTCCGCGTGTATCGGTAA<br>AGCGATGAAAACAAAACCTCAGA        | 390bp        | 56/30                           |
| FBN1X30F<br>FBN1X30R | GATCCCACCATGAGGGTAGA<br>GCAGGCAATTTGAACTTCATT          | 470bp        | 56/30                           |
| FBN1X31F<br>FBN1X31R | TTATGCAAAGCTTCATTTGGA<br>TGTGCCCTTAAATATCCTTACTTTTC    | 396bp        | 56/30                           |
| FBN1X32F             | AGCAAATGTAAATTGGCCTCT                                  | 441bp        | 50/35                           |

|                            |                                                       |       |                |
|----------------------------|-------------------------------------------------------|-------|----------------|
| FBN1X32R                   | AATTTCAAAGAAGTGGGAAGCTAAA                             |       |                |
| FBN1X33F<br>FBN1X33R       | TGGGAAGTTTGAAGGCAAGT<br>ATCATTATTAACAGAAAGGGTGGT      | 356bp | 56/30          |
| FBN1X34F<br>FBN1X34R       | GAGGTGCTTATCAAGGACTGC<br>GAGCTCTAGTGCCAAATGATGA       | 389bp | 56/30          |
| FBN1X35F<br>FBN1X35R       | TGTCAAATTGAAGTTATGCCAAA<br>AGCTGGAAACCTAATCCCTCT      | 400bp | 50/35          |
| FBN1X36F<br>FBN1X36R       | GCCCAGATTGGTGTAGATACTC<br>TGAGAAAAGGTATCTGTGATTCTTAAT | 393bp | 56/30          |
| FBN1X37F<br>FBN1X37R       | TCTGAAGTGGAAAGACTGCATTT<br>TTCCCTATGGAAAAGATATCTGAA   | 431bp | 50/35+ 10%DMSO |
| FBN1X38F<br>FBN1X38R       | TCGGTAGTGTATAATGTTTCATGGG<br>CTACAGGGCTGAGAGGACTGA    | 435bp | 56/30          |
| FBN1X39-40F<br>FBN1X39-40R | TCAGACGGGCAGAGTAACAA<br>CCTGGCTATGTTTCGTGTTTAGA       | 556bp | 56/30          |
| FBN1X41F<br>FBN1X41R       | GAGGACACGGATGAATGAAA<br>AGGGATGCCAGCACTCAG            | 393bp | 56/30          |
| FBN1X42F<br>FBN1X42R       | TTTGTGTCCTTATCAAAGTCAAG<br>TGACCAGCACCAACTGTGAA       | 452bp | 56/30          |
| FBN1X43F<br>FBN1X43R       | ACAGGCAAGATTATATCTGTAGGAA<br>CAGGGTGTTCACAGTTTG       | 406bp | 56/30          |
| FBN1X44F<br>FBN1X44R       | GTCCCTATTGCCATCACCAC<br>TCCACACCATGCCCTTACT           | 411bp | 56/30          |
| FBN1X45F<br>FBN1X45R       | CGAAGGACATCTTGGTTGCT<br>TTTTGACAATATCCCTTTTCCA        | 470bp | 56/30          |
| FBN1X46F<br>FBN1X46R       | TGCCTGGTAAATGAGAGTAAGTT<br>TCACTGCTGCATATCTGTCTG      | 440bp | 56/30          |
| FBN1X47F<br>FBN1X47R       | TCAAGAAGTTCCTCAGCCTATGGA<br>TGTATTTGACAAGTCCCATAACCA  | 386bp | 56/30          |
| FBN1X48F<br>FBN1X48R       | AAGCCAGCAAAGGCCACTA<br>AAAAACAAGCCTTATAGGGAGGA        | 397bp | 50/35+10% DMSO |
| FBN1X49F<br>FBN1X49R       | TTTTCTCCATGGTGAATTTT<br>CTTGCCAGAAGGATGAGACC          | 415bp | 50/35+10% DMSO |
| FBN1X50F<br>FBN1X50R       | TCCACAGTGTATGGTACAGAAA<br>GGGTGAATGAAAACCTCTCCATC     | 396bp | 50/35+10% DMSO |
| FBN1X51F<br>FBN1X51R       | GGAGTATTGCTGTGGTCCTGA<br>GAAAATAACTACCAAGCTCCTGAGA    | 441bp | 50/35          |
| FBN1X52F<br>FBN1X52R       | CATCATTTTCAATATGCACAGCA<br>GCACTTAATTTCCAAGATAGATGG   | 280bp | 52/30          |
| FBN1X53F<br>FBN1X53R       | TTTGTCCCTTCATTAGATAGCAA<br>AACTAATTCAGTGCCATCTTGG     | 362bp | 50/35+ 10%DMSO |
| FBN1X54F<br>FBN1X54R       | TGGATGTCAAAGTGAGACTCTGT<br>AATGATCAAATGGCCCATCA       | 387bp | 52/30          |
| FBN1X55F<br>FBN1X55R       | TGGGAGACCCTTGATCCAT<br>CCGTATTGTCCACGGACTATTTA        | 390bp | 52/30          |
| FBN1X56F<br>FBN1X56R       | GAGCAGAAGGAAAATACAGCCA<br>CCTGACATGCGGTTAAGAGA        | 401bp | 52/30          |
| FBN1X57F<br>FBN1X57R       | AAAGGAACAAAGGGAGGGAA<br>CGGCATCTCCAAAATATGAA          | 384bp | 50/35+10% DMSO |
| FBN1X58F<br>FBN1X58R       | CTTGCTTCTTCTCACCAGG<br>GGCAGCATGACCTCAAATGT           | 505bp | 50/35+10% DMSO |
| FBN1X59F<br>FBN1X59R       | TCTTAGGCCAAAAATATAGTAACACA<br>CGGGGAAAGAAAAAGGAAAC    | 400bp | 52/30          |
| FBN1X60F<br>FBN1X60R       | CCTTTTCTTTCCCGAAAC<br>AAGCACCTCTGCCTGTAGA             | 345bp | 56/30          |
| FBN1X61F<br>FBN1X61R       | CTCTCCTTGCCTTTTGCTGT<br>AAAGGCCAAATAAGGCCAAC          | 437bp | 52/30          |
| FBN1X62F<br>FBN1X62R       | TCCTCTGCTGTTGGGATAAGA<br>TCAAGCATGAAACAAAACACG        | 510bp | 52/30          |
| FBN1X63F<br>FBN1X63R       | TCTCCTGGACTTAGCAGCAG<br>GCTGTTTTGCAAAGACTGTACTT       | 448bp | 52/30          |
| FBN1X64F<br>FBN1X64R       | GCCTGTCTTACCTTCTGAGA<br>CTTTTGCCAAGCTAACTGGA          | 502bp | 52/30          |
| FBN1X65F<br>FBN1X65R       | ATCCTCCAGTGGACAAGCAA<br>GCTCAGGGAATGTCTGGAGT          | 433bp | 50/35+10% DMSO |
| FBN1X66F<br>FBN1X66R       | TGCCAATTTAATACACTTGTGGTC<br>TCACCTGTACCTTGCTTTGG      | 719bp | 52/30          |

**Table S2: Primers and PCR Conditions for ADAMTS17 Gene**

| Gene/Exon                    | Primer Sequence 5' – 3'                           | Product Size | Annealing Temperature °C/Cycles |
|------------------------------|---------------------------------------------------|--------------|---------------------------------|
| ADAMTS17X1F<br>ADAMTS17X1R   | TCCGCAGCGCTAATTACTTT<br>ACCCGATTCCCGTACTCC        | 353bp        | 56/30 +10%DMSO                  |
| ADAMTS17X2F<br>ADAMTS17X2R   | AGGGAAGGGAAGGCAGC<br>AGGTGGAAAGGCAGGGG            | 636bp        | 56/30 +10%DMSO                  |
| ADAMTS17X3F<br>ADAMTS17X3R   | CAAATCACAGCAAGGTGGTC<br>TTCTCACTCATGTGGCTTCAGT    | 359bp        | 56/30                           |
| ADAMTS17X4F<br>ADAMTS17X4R   | CTGACCACTCTCTCGGGC<br>ACCCAGCGTCTTCTCACT          | 383bp        | 56/30                           |
| ADAMTS17X5F<br>ADAMTS17X5R   | TTTCTGTGTCCCAAGTTCCC<br>AGAGAGTGACGGAGACTGGC      | 290bp        | 56/30                           |
| ADAMTS17X6F<br>ADAMTS17X6R   | GCCTCCACCTTAACGTCCTT<br>GTGGCCCAAGGTCTGATT        | 362bp        | 56/30                           |
| ADAMTS17X7F<br>ADAMTS17X7R   | TTGCAGGATGACTACTTGAGG<br>GCTTGTTTGAGGACAGCTCC     | 237bp        | 56/30                           |
| ADAMTS17X8F<br>ADAMTS17X8R   | TTGATTGTGCATGACGTTGA<br>CAGATGCAGCAAAGGCATAG      | 314bp        | 56/30                           |
| ADAMTS17X9F<br>ADAMTS17X9R   | AAGACTTGATTTACCTTAGCATGG<br>TTCTCCACTTCACACTTGCTG | 329bp        | 56/30                           |
| ADAMTS17X10F<br>ADAMTS17X10R | GGAGGTGCCCTCTTCTCAGT<br>GTGCTGAGTGTGAATGCC        | 361bp        | 56/30                           |
| ADAMTS17X11F<br>ADAMTS17X11R | ATTTGAAACAGTGGTTGGGGC<br>TGTTTCAGGGGCTCCTAAGT     | 304bp        | 56/30                           |
| ADAMTS17X12F<br>ADAMTS17X12R | TGGCAGCACGGCATTFTT<br>CTTCTAATGCTCAGCGGGAG        | 342bp        | 56/30 with<br>10%DMSO           |
| ADAMTS17X13F<br>ADAMTS17X13R | CCCTTCCTCTCCTCCCC<br>CTGGGTTGGTTTGGGAAAG          | 369bp        | 56/30                           |
| ADAMTS17X14F<br>ADAMTS17X14R | CTTCTCAGGGTTCCCTCT<br>CCTGAGACCTCTGCTTACCC        | 315bp        | 56/30                           |
| ADAMTS17X15F<br>ADAMTS17X15R | TATGCTGCACCTCATGGAAA<br>TCCACTACCATCTAGCCCTTAAA   | 331bp        | 56/30                           |
| ADAMTS17X16F<br>ADAMTS17X16R | CTGTGGAAGGGAGACCTCTG<br>GAGGTCCCAGGCAGAAGTAA      | 361bp        | 56/30                           |
| ADAMTS17X17F<br>ADAMTS17X17R | AAAGAGCTGGTTACCCCTCA<br>ATGTCTCACACTCTGCGTGC      | 370bp        | 56/30                           |
| ADAMTS17X18F<br>ADAMTS17X18R | GCACCCAAACATGCTTTCAT<br>GCATAGAGCAGTACTGTGGCA     | 331bp        | 56/30 with<br>10%DMSO           |
| ADAMTS17X19F<br>ADAMTS17X19R | AGGGCAGCAATTCCAGGAT<br>CAACTCAAGCTGACCTGGG        | 415bp        | 56/30                           |
| ADAMTS17X20F<br>ADAMTS17X20R | GCACCTGGCACATTGGA<br>GCCTAGTTACGCTGGGACTG         | 357bp        | 56/30                           |
| ADAMTS17X21F<br>ADAMTS17X21R | CCACTCAGGCTGTCCTGTCT<br>TTTCTGGCTGAAAGAACCTCA     | 370bp        | 56/30                           |
| ADAMTS17X22F<br>ADAMTS17X22R | AGTGCAAAGGGTTGACGTGT<br>CCAAGTCCACGCTCATGTT       | 429bp        | 56/30                           |

**Table S3: Variants Identified in *ADAMTS17*.**

| Location | Nucleotide Change | Amino Acid Change | Identification Numbers <sup>a</sup> |
|----------|-------------------|-------------------|-------------------------------------|
| Intron1  | c.79+31 C>G       | NA                | rs2585224                           |
| Intron2  | c.451-70 C>T      | NA                | rs11639041                          |
| Intron3  | c.617-41 A>G      | NA                | rs7497712                           |
| Exon 4   | c.647 C>T         | S216L             | rs7496668                           |
| Exon 4   | c.756 C>T         | A252              | rs7496640                           |
| Intron4  | c.789+8 C>T       | NA                | rs7496614                           |
| Intron 5 | c.873+58 T>C      | NA                | rs4965297                           |
| Intron5  | c.873+62 C>T      | NA                | rs4965296                           |
| Exon6    | c.1017 C>T        | A339              | rs4965613                           |
| Intron6  | c.1031+81 A>G     | NA                | rs4965295                           |
| Exon7    | c.1053 G>A        | K351              | rs4369638                           |
| Intron9  | c.1322+38 A>G     | NA                | rs8024690                           |
| Intron9  | c.1323-11 G>A     | NA                | ss161151830                         |
| Exon10   | c.1445 T>C        | M482T             | rs28567966                          |
| Exon12   | c.1696 A>C        | R566              | rs12907333                          |
| Intron13 | c.1889-44 G>A     | NA                | ss161151831                         |
| Exon14   | c.1962 C>T        | D654              | rs61752832                          |
| Intron14 | c.2016+87 T>G     | NA                | ss161151832                         |
| Intron15 | c.2137+59 C>G     | NA                | ss161151833                         |
| Exon15   | c.2112 C>T        | G704              | rs4965583                           |
| Intron15 | c.2138-12 C>T     | NA                | rs28529328                          |
| Intron15 | c.2138-40 C>G     | NA                | rs28587358                          |
| Intron16 | c.2296-56 T>A     | NA                | rs4965569                           |
| Exon18   | c.2472 C>T        | I824              | rs61752831                          |
| Intron18 | c.2591+6 A>G      | NA                | rs8028251                           |
| Intron19 | c.2796+96 G>A     | NA                | rs12900132                          |
| Intron20 | c.2949+35 G>A     | NA                | rs7175995                           |
| Intron20 | c.2949+42 A>G     | NA                | rs2573607                           |
| Exon22   | c.3281 A>G        | N1094S            | rs2573652                           |

NA: not applicable. <sup>a</sup>SNP database (dbSNP) identification numbers, reference SNP (rs) numbers for previously reported SNPs, submitter SNP (ss) numbers for the SNPs identified in this study.

**Table S4: Localization of ADAMTS17 in Different Tissues Using IHC on TMA.**

| <b>Tissue</b>         | <b>Cytoplasm</b> | <b>Membrane</b> |
|-----------------------|------------------|-----------------|
| Colon                 | +1               | 0               |
| Pancreas              | 0                | 0               |
| Liver                 | +2               | +1              |
| Kidney                | +2               | 0               |
| Lung                  | +1               | 0               |
| Heart                 | +1               | 0               |
| Ovary                 | +1               | 0               |
| Testis                | +2               | +3              |
| Uterine smooth muscle | +1               | 0               |
| Lymph node            | +2               | 0               |
| Spleen                | +3               | 0               |
| Placenta              | +2               | 0               |
| Thyroid               | 0                | 0               |
| Ovarian cancer        | +3               | +3              |
| Endometrial cancer    | +3               | +3              |
| Colon cancer          | +3               | +2              |
